# Supplementary material for: First Detection and Genomic Characterization of Bovine Norovirus from Yak
Source: MDPI journal article supplement (doi:10.3390/pathogens11020192), 2022-01-31
Supplement: s1 [file s1]

**Table S1.** The identical aa mutations of GIII.P2\_GIII.4 strain and the other genotypes strains .

| Genotype | Amino Acid Difference Site in VP1                                                                                                                                                                                                                                                                                                                                                                                 | Amino Acid Difference Site in VP2                                                                                                                                                                                             |
|----------|-------------------------------------------------------------------------------------------------------------------------------------------------------------------------------------------------------------------------------------------------------------------------------------------------------------------------------------------------------------------------------------------------------------------|-------------------------------------------------------------------------------------------------------------------------------------------------------------------------------------------------------------------------------|
| GIII.1   | L79M,V121L,A150T,A159V,S233A,V241F,<br>V244S,Q245D,L252H,Q257R,D268E,P274P,A275P,<br>S276C,F283M,V284L,A288E,E289S,T290A,A295F,<br>A304V,L314E,S323R,V328F,A329YV334Y,W335Y,<br>Q336T,S338D,K342S,N346R,S357E,G358S,M360L,<br>R364Q,D370S,Y371H,P375A,T376G,D378L,S379A,<br>I383P,S388G,S393A,V404I,C413S,N414S,L418E,<br>L432M,F440L,S473P,L476I,L488F,T490L,K495R                                               | T3A,D28E,S39Q,Q46A,D65A,F66Y,A70S,V72M,<br>Q73A,F76Y,A78E,V85S,V88G,I94L,V108Q,L117T,<br>A119C,S137T,S141N,,146A,T179G,S180L,A182Y,<br>S183T,Y184S,S186F,S187N,F188Q,N189G,L190W,<br>G191F,W192N,N194D,T195R,D196M,R197P      |
|          | L79M,V121L,A150T,E159V,N233A,E241F,A244S,<br>Q245D,F252H,Q257R,D268E,P274T,S275A,S276C,<br>F283M,V284L,E289S,P290A,V295F,D304V,F314E,S323R,<br>V328F,A329Y,V334Y,G335Y,E335Y,E336T,T338D,R342S,<br>N346R,D357E,E358S,A360L,L364Q,R370S,N371H,<br>P375A,T376G,H378L,S379A,I383P,A388G,S393A,<br>V404I,C413S,N414S,L418E,L432M,F440L,N473P,L476I,<br>L488F,V490L,K495R                                              | S3A,D28E,A39Q,E46A,D65A,F66Y,A70S,Q72M,E73A,<br>G78E,V85S,V88G,V94L,V108Q,L117T,D119C,S137T,<br>R141N,H146A,A179G,S180L,A182Y,S183T,Y184S,S186S,<br>S186F,S187N,F188Q,N189G,L190W,G191F,W192N,N194<br>D,<br>T195R,D196M,R197P |
| GIII.2   | L49M,V121L,A150T,E159V,S233A,E241,A244S,Q245D,<br>F252H,Q257R,D268E,P274T,S275P,S276C,F283M,V284L,<br>G288E,G289S,T290A,A295F,A304V,F314E,T323R,L328F,<br>A329Y,L334Y,E335Y,H336T,H338D,T342S,N346R,D357E,<br>G358S,M360L,L364Q,E370S,G371H,P375A,S376G,N378L,<br>F188Q,N189G,L190W,G191F,W192N,F193T,N194D,T195R<br>T39A,M383P,A388G,S393A,V404I,C413S,N414S,H418E,<br>L432M,L404F,A473P,L476I,L488F,V490L,K495R | T3A,D28E,S39Q,S46A,E65A,F66Y,A70S,I72M,S73A,F76Y,<br>Q78E,V85S,A88G,V94L,V108Q,L117T,A119C,S137T,R141<br>N,<br>M146A,F179G,S180L,A182Y,S183T,Y184S,S186F,S187N,<br>D196M,R197P                                                |
| GIII.3   |                                                                                                                                                                                                                                                                                                                                                                                                                   |                                                                                                                                                                                                                               |

Note: There is no identical aa mutations between GIII.P2\_GIII.4 and the other genotypes strains.

**Table S2.** Primers sequences used for genomic amplification and sequencing .

| Primer Name | Nucleotide<br>sequence(5'→3') | Amplicon (bp) | Location <sup>a</sup> | Annealing<br>Temperature (°C) |
|-------------|-------------------------------|---------------|-----------------------|-------------------------------|
| J1-F        | GTGAATGAAGACTTTGACGATATGG     | 1227          | 1-1227                | 55                            |
| J1-R        | CTCGACGCGCTTCAGGGTCTGGCC      |               |                       |                               |
| J2-F        | AGATATTCAACATAATCAAGA         | 493           | 1160-1672             | 55                            |
| J2-R        | AGTCTGCGGCAATGTTGGCCATG       |               |                       |                               |
| J3-F        | GCCCCCTGGCATCGGGAAGACC        | 1458          | 1491-2948             | 56                            |
| J3-R        | GGGTTCCAGTCAATCTTCTCC         |               |                       |                               |
| J4-F        | ATCAGAGAGGAGCGGGGTGGCAACTA    | 761           | 2764-3524             | 63                            |
| J4-R        | ATGGCACAGATGACTGTGTTGCCAGA    |               |                       |                               |
| J5-F        | GCAACACAGTCATCTGTGCC          | 411           | 3503-3913             | 57                            |
| J5-R        | GATAGCCAGAGCTGGTGGTC          |               |                       |                               |
| J6-F        | GCCTCGAACAGGTGATGGACCA        | 1429          | 3827-5256             | 62                            |
| J6-R        | GTAAACTCMCCCTGGGGGGC          |               |                       |                               |
| J7-F        | TCCCGATTTTGTAAATGAAGATGACT    | 419           | 5049-5467             | 54                            |
| J7-R        | TGGGGTGAGAAAGGAGGTATCA        |               |                       |                               |
| J8-F        | ATGCGCGTTAGAGTGATC            | 817           | 5369-6185             | 53                            |
| J8-R        | CCTGCTGAACATGAGAAAGGA         |               |                       |                               |
| J9-F        | CGCATGTAYAACGGCTGGAC          | 908           | 5342-6249             | 58                            |
| J9-R        | GCAAACCTCTGCTCCAAGAACGT       |               |                       |                               |
| J10-F       | TGGGAACCCCAAGACTATCGTG        | 425           | 6203-6627             | 58                            |
| J10-R       | TTAATCCGAGGAAGACGACGG         |               |                       |                               |
| J11-F       | TGGGAAATGTTAGTGTGGCCGCC       | 400           | 6588-6988             | 63                            |
| J11-R       | GGCAGCACTGTGGTGAAGCCACCG      |               |                       |                               |
| J12-F       | GCTGCTTGATTGGAATGG            | 420           | 6919-- 7321           | 50                            |
| J12-R       | TAACAGCAAGAATAGGGGAAAA        |               |                       |                               |

**Table S3.** Primers sequences used for verify the complete genome sequences.

| Primer Name | Nucleotide<br>sequence(5'→3') | Amplicon (bp) | Location <sup>a</sup> | Annealing<br>Temperature (°C) |
|-------------|-------------------------------|---------------|-----------------------|-------------------------------|
| J1-1-F      | GTGAATGAAGACTTTGACGA          | 1064          | 1-1064                | 53                            |
| J1-1-R      | AGCCCAACTCCACCAAGTAT          |               |                       |                               |
| J2-1-F      | AGATGTGGCCAACCTTCTGG          | 920           | 960-1879              | 56                            |
| J2-1-R      | GATTCTCGATTTCTGAGAGTTG        |               |                       |                               |
| J3-1-F      | CTGGACCACATGAACCTGGG          | 980           | 1801-2780             | 58                            |
| J3-1-R      | CCCCGCTCCTCTGTGATTTT          |               |                       |                               |
| J4-1-F      | CGGAAGACCAATGCCTTCT           | 1040          | 2701-3740             | 57                            |
| J4-1-R      | CGCATGACCTGTTGTAGGGA          |               |                       |                               |
| J5-1-F      | CACCTATGAGCCAGCCTATC          | 993           | 3666-4658             | 56                            |
| J5-1-R      | GTCGGCTTGAGGCCATACC           |               |                       |                               |
| J6-1-F      | TCTTGAGTTTGATCCAGACAAG        | 972           | 4599-5570             | 55                            |
| J6-1-R      | GCCCCTGGTGAAAAAGGATG          |               |                       |                               |
| J7-1-F      | CATTGTTGACGTCCGCAC            | 1043          | 5494-6536             | 56                            |
| J7-1-R      | CAGAAAGGGGGAAGGTCACC          |               |                       |                               |
| J8-1-F      | CTTACTGAACTATGTGAGCCC         | 333           | 6418-6750             | 56                            |
| J8-1-R      | AGGAGCGCTGTTGGAGTT            |               |                       |                               |
| J9-1-F      | TAATGGCTGCTGAGTTCTTT          | 666           | 6625-7290             | 53                            |
| J9-1-R      | GAAATAAACTCACTGCTCACT         |               |                       |                               |
